# Supplementary material for: Response of soil microbial community composition and function to prolonged heavy metal exposure
Source: Research Square preprint supplement (doi:10.21203/rs.3.rs-6199440/v1), 2025-03-14
Supplement: Supplementary file 1 [file 18fed2d0b826539f2cbbff40.docx]

**Supporting Information**

**Response of soil microbial community composition and function to prolonged heavy metal exposure**

Zhigang Zhao · Yongfeng Wang (corresponding author) · Linghao Kong · Liyuan Zhao · Yachao Li · Teng He · Shigao · Liu · Xiangcai Han · Songsong Gu · Shuyu Wu · Jiahao Zhang · Jintao Zhang · Bing Li

Z. Zhao

School of Earth Sciences, China University of Geosciences, Wuhan 430074, China

e-mail: 156513449@qq.com

Z. Zhao · Y. Wang (🖂)· L. Kong ·L. Zhao · Y. Li · T. He · S. Liu · X. Han · S. Gu · S. Wu · J. Zhang · J. Zhang · B. Li

Yantai Center of Coastal Zone Geological Survey, China Geological Survey, Yantai 264000, China

Resources Observation and Research Station of Lan-Sea Interaction Field in the Yellow River Estuary, Yantai 264000, China

e-mail: wangyongfeng@qq.com

L. Kong

e-mail: 1245046910@qq.com

L. Zhao

e-mail: 353840397@qq.com

Y. Li

e-mail: 1095779284@qq.com

T. He

e-mail: 15169762229@163.com

S. Liu

e-mail: 758187672@qq.com

X. Han

e-mail: 1771879956@qq.com

S. Gu

e-mail: 372978364@qq.com

S. Wu

e-mail: hnwushuyu@163.com

J. Zhang

e-mail: 18769441868@163.com

J. Zhang

e-mail: 1026176676@qq.com

B. Li

e-mail: 493907595@qq.com

**Contents**

Fig. S1 The location of study area and the sampling sites.

Fig. S2. Total heavy metal concentrations of soil surrounding gold mining.

Fig. S3Venn diagram displaying the OTU richness distribution in three groups.

Fig. S4 Canonical correlation analysis (CCA) of environmental factors with the bacterial community.

Fig. S5 Heatmap of Spearman’s rank correlation between the environmental factor and the relative abundance of bacterial genera in soil.

Fig. S6 Relative abundance of keystone taxa under different level combined heavy metals concentrations in networks.

Fig. S7 The counts and varieties of bacterial community functions at KEGG class 3 in each phylum from the soil samples of group H

Table S1 Microbial community diversity index (sequence similarity 97%level).

Table S2 Significance tests of bacterial communities among samples with varying levels of heavy metal concentration

Table S3 Relative abundance of eleven most abundant phyla (>1%) in soil samples from different groups.

Table S4 Relative abundance of twenty five most abundant classes (>1%) in soil samples from different groups.


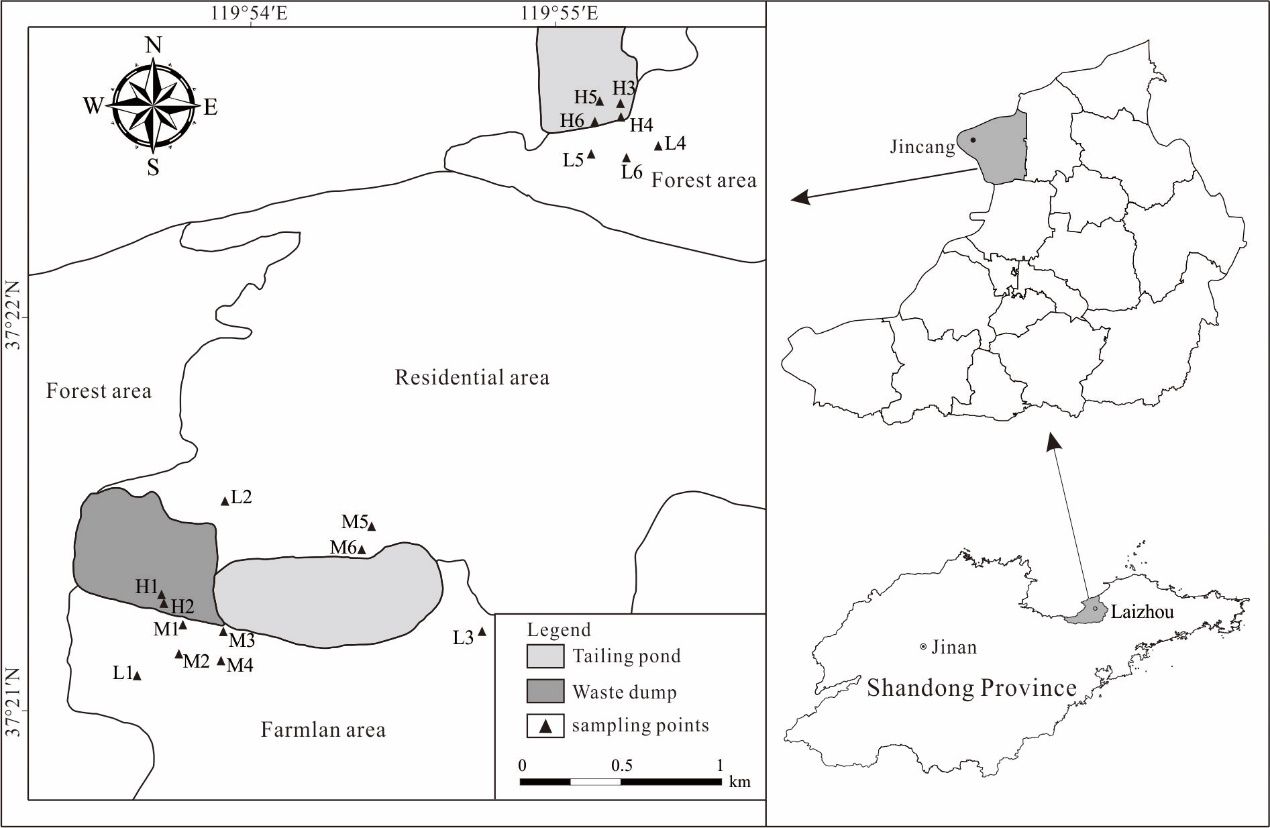
Fig. S1 The location of study area and the sampling sites.


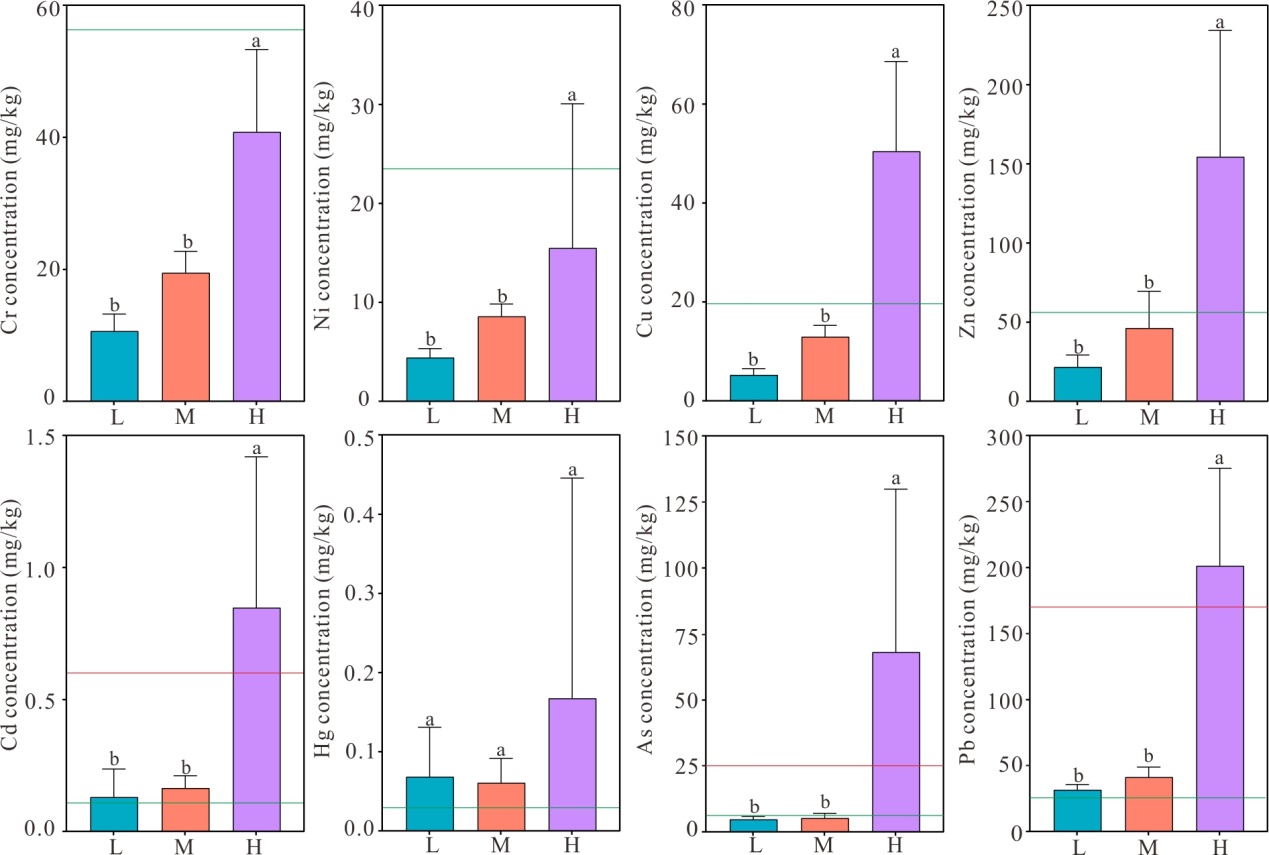


Fig. S2. Total heavy metal concentrations of soil surrounding gold mining. The error bars represent the standard deviation, and different letters imply significant differences at p < 0.05. The green solid line indicates the background value in Eastern Shandong province and the red solid line represents the risk screening value.


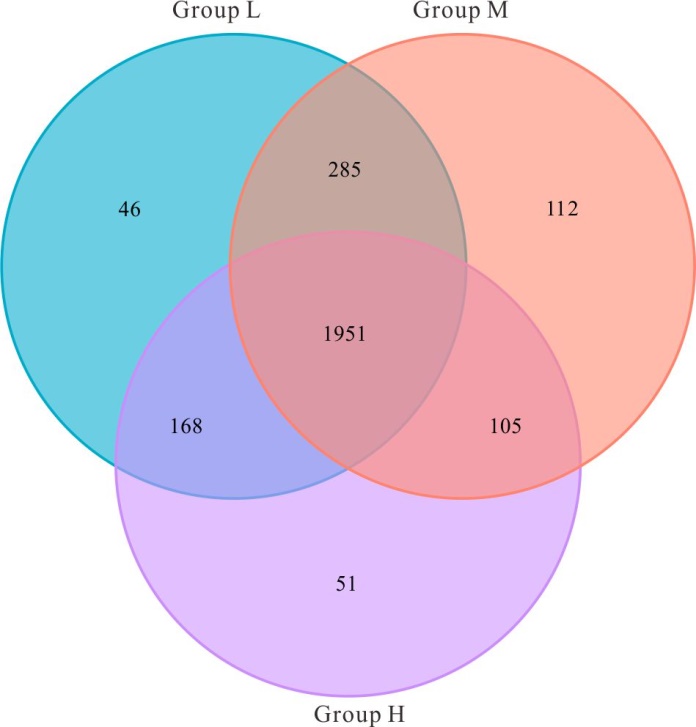


Fig. S3 Venn diagram displaying the OTU richness distribution in three groups


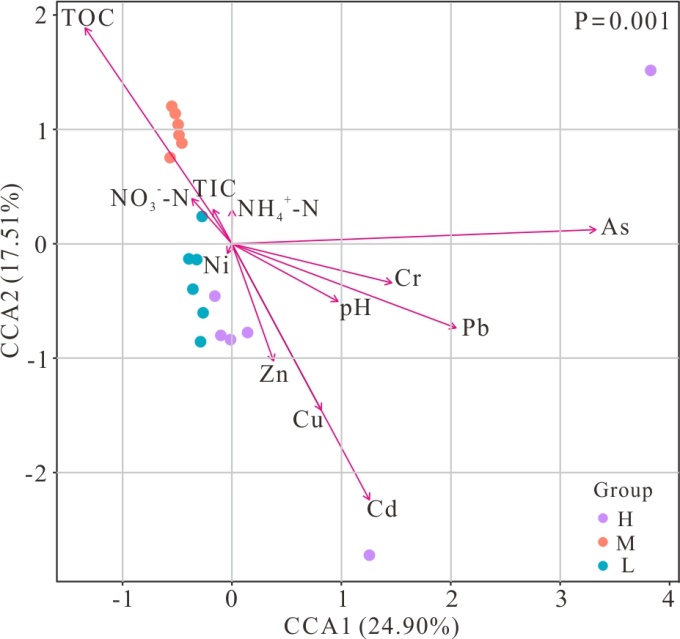


Fig. S4 Canonical correlation analysis (CCA) of environmental factors with the bacterial community.


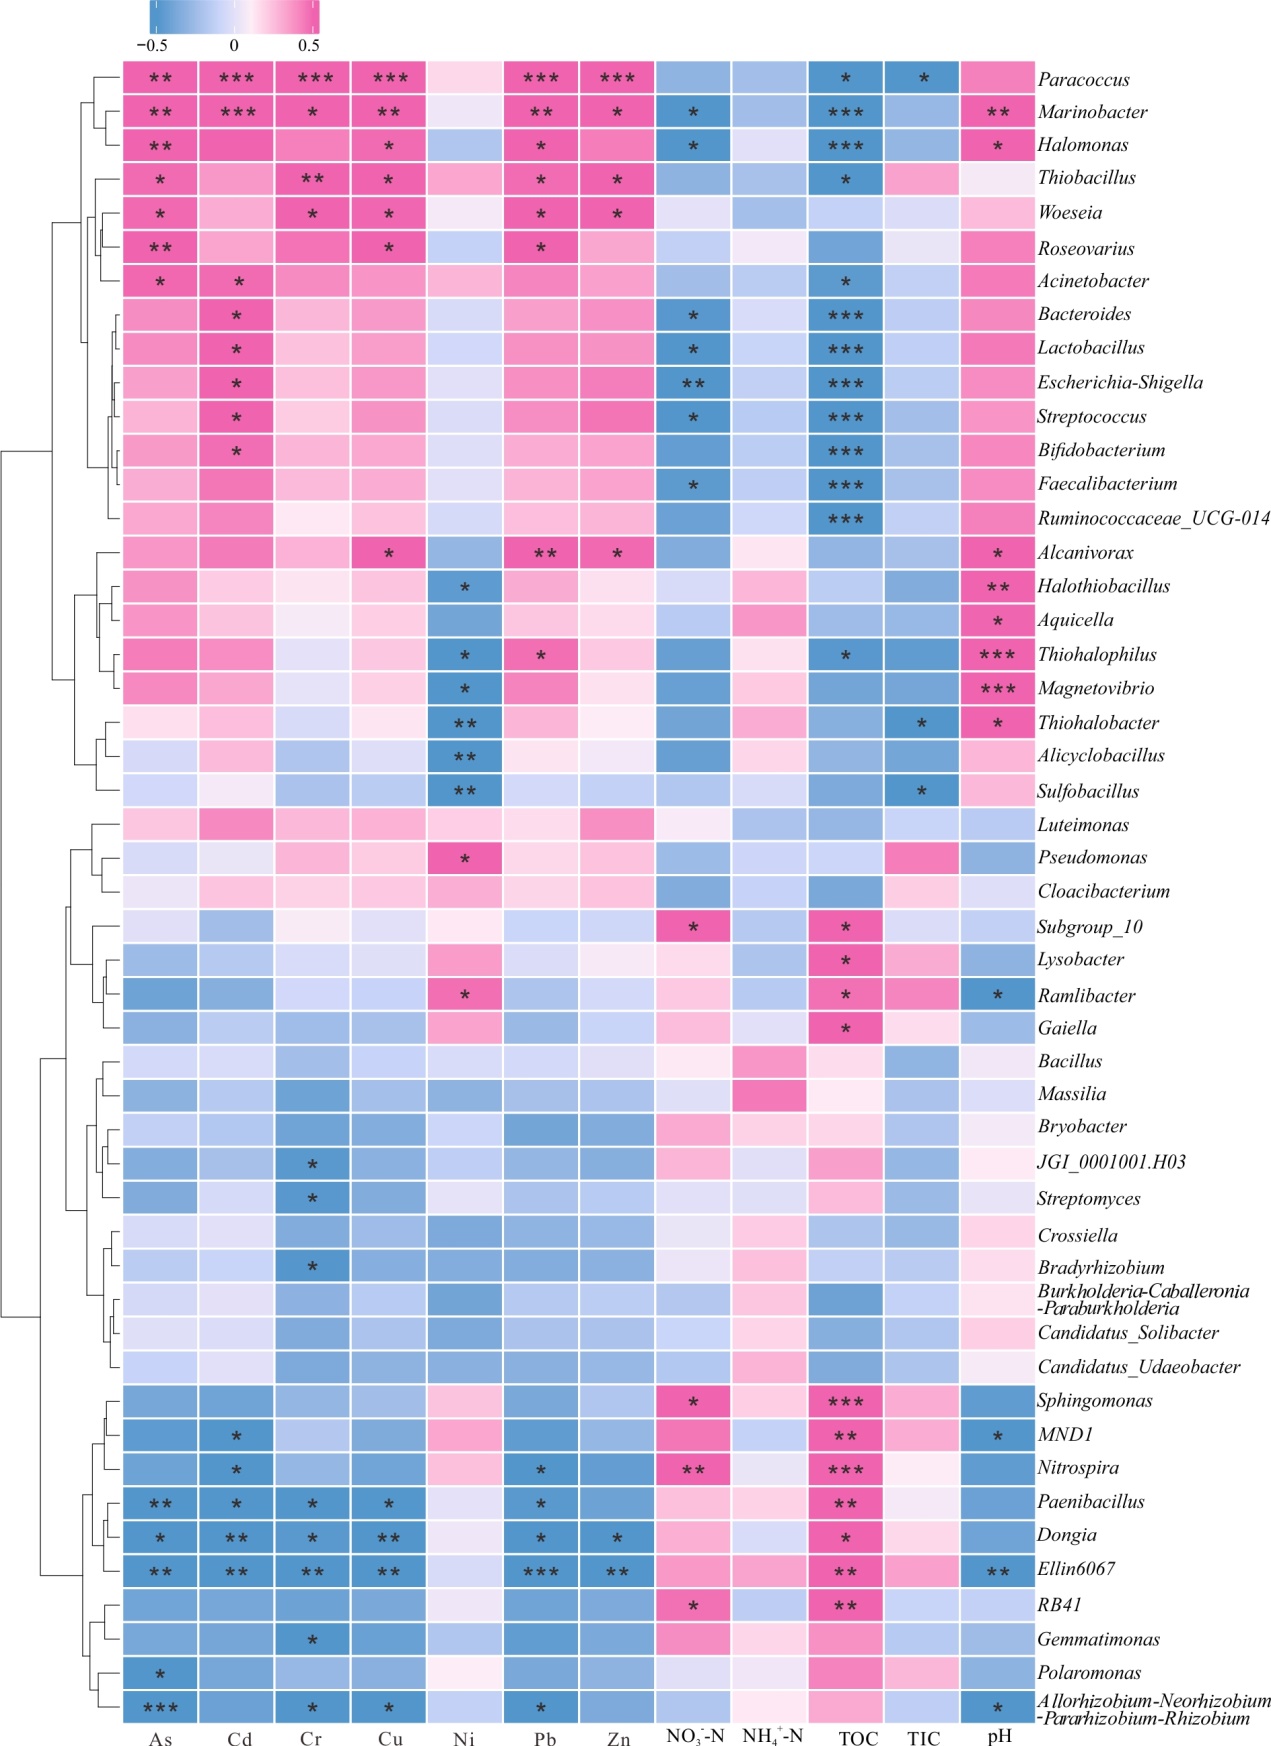
Fig. S5 Heatmap of Spearman’s rank correlation between the environmental factor and the relative abundance of bacterial genera in soil. * in the figure indicates p < 0.05, ** indicates p <0.01 and *** indicates p < 0.001.


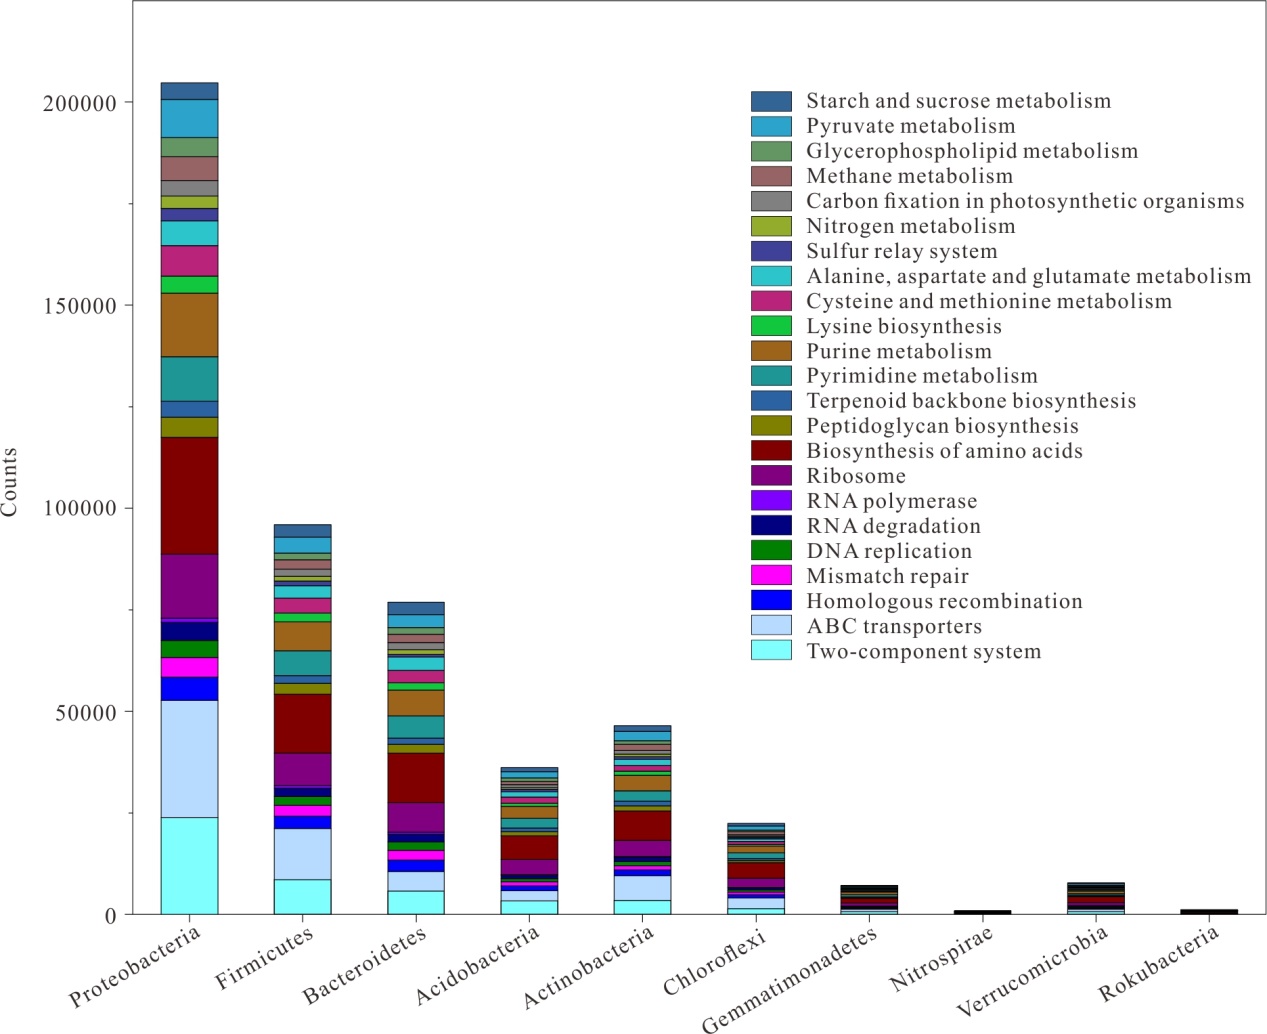

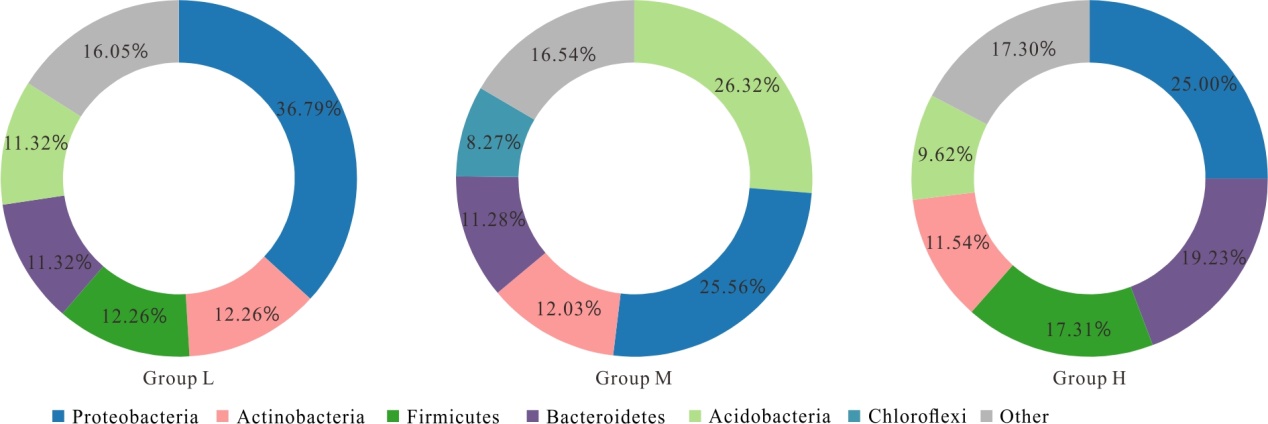
Fig. S6 Relative abundance of keystone taxa under different level combined heavy metals concentrations in networks.

Fig. S7 The counts and varieties of bacterial community functions at KEGG class 3 in each phylum from the soil samples of group H

Table S1 Microbial community diversity index (sequence similarity 97%) level

| **Groups** | **Sites** | **No. of seqs** | **No. of OTUs** | **Observed species** | **ACE** | **Chao 1** | **Simpson** | **Shannon** | **Coverage** |
| --- | --- | --- | --- | --- | --- | --- | --- | --- | --- |
| L | L1 | 63957 | 1461 | 462 | 1565.401 | 1640.158 | 0.991 | 8.159 | 0.994 |
| L2 | 54217 | 1389 | 438 | 1447.600 | 1519.791 | 0.996 | 9.118 | 0.997 |
| L3 | 56353 | 1511 | 487 | 1574.990 | 1629.009 | 0.993 | 8.783 | 0.996 |
| L4 | 57114 | 1485 | 472 | 1538.474 | 1602.235 | 0.995 | 9.004 | 0.996 |
| L5 | 55106 | 1503 | 481 | 1546.721 | 1584.258 | 0.996 | 9.142 | 0.997 |
| L6 | 45247 | 1607 | 510 | 1660.003 | 1673.163 | 0.995 | 9.060 | 0.997 |
| Mean | 55332 | 1493 | 475 | 1555.531 | 1608.102 | 0.994 | 8.877 | 0.996 |
| M | M1 | 64285 | 1823 | 485 | 1873.264 | 1905.075 | 0.995 | 9.116 | 0.995 |
| M2 | 62374 | 1866 | 488 | 1904.023 | 1920.390 | 0.995 | 9.217 | 0.996 |
| M3 | 62838 | 1847 | 489 | 1871.943 | 1912.333 | 0.994 | 9.183 | 0.996 |
| M4 | 61576 | 1859 | 497 | 1877.861 | 1912.457 | 0.995 | 9.343 | 0.996 |
| M5 | 59364 | 1858 | 508 | 1952.707 | 1977.102 | 0.996 | 9.222 | 0.994 |
| M6 | 48428 | 1678 | 466 | 1805.209 | 1850.593 | 0.994 | 8.771 | 0.994 |
| Mean | 59811 | 1822 | 489 | 1880.834 | 1912.992 | 0.995 | 9.142 | 0.995 |
| H | H1 | 44365 | 1383 | 481 | 1462.528 | 1637.634 | 0.996 | 9.172 | 0.997 |
| H2 | 46478 | 1501 | 500 | 1545.977 | 1610.161 | 0.995 | 9.259 | 0.997 |
| H3 | 45657 | 1340 | 483 | 1386.571 | 1495.528 | 0.997 | 9.290 | 0.998 |
| H4 | 47317 | 1615 | 503 | 1650.514 | 1686.685 | 0.997 | 9.500 | 0.998 |
| H5 | 63551 | 1060 | 423 | 1121.213 | 1230.802 | 0.915 | 5.790 | 0.995 |
| H6 | 58109 | 1119 | 442 | 1214.364 | 1361.842 | 0.974 | 7.421 | 0.996 |
| Mean | 50913 | 1336 | 472 | 1396.861 | 1503.775 | 0.979 | 8.405 | 0.997 |

Table S2 Significance tests of bacterial communities among samples with varying levels of heavy metal concentration

| Groups | PERMAOVA | |  | ANOSIM | |
| --- | --- | --- | --- | --- | --- |
| F | P |  | R | P |
| L, M, H | 5.0122 | 0.001 |  | 0.6498 | 0.001 |
| L,M | 5.4672 | 0.004 |  | 0.8148 | 0.001 |
| L,H | 2.2463 | 0.007 |  | 0.3278 | 0.005 |
| M,H | 7.6378 | 0.003 |  | 0.7833 | 0.002 |

Table S3 Relative abundance of eleven most abundant phyla (>1%) in soil samples from different groups

| Phylum | Groups (Percentage, %) | | |
| --- | --- | --- | --- |
| L | M | H |
| Proteobacteria | 31.89±5.46a | 29.64±4.71a | 40.09±17.75a |
| Acidobacteria | 20.98±5.33b | 30.43±7.36a | 9.32±4.41c |
| Firmicutes | 8.36±2.89b | 3.46±1.25b | 18.95±6.85a |
| Actinobacteria | 12.80±4.15a | 7.77±1.39b | 7.90±2.01b |
| Bacteroidetes | 6.19±2.24b | 3.89±0.55b | 12.67±3.74a |
| Chloroflexi | 5.92±1.10ab | 7.51±2.26a | 3.58±2.20b |
| Gemmatimonadetes | 3.83±1.03b | 8.69±1.02a | 1.28±0.53c |
| Verrucomicrobia | 2.56±0.94a | 1.01±0.31b | 1.48±0.75b |
| Nitrospirae | 1.36±0.64b | 2.52±0.66a | 0.38±0.17c |
| Rokubacteria | 0.84±0.55b | 2.43±0.67a | 0.36±0.17b |

Note: Data are means±standard deviation (n=6). Different letters represent significant differences among three groups at p <0.05.

Table S4 Relative abundance of nineteen most abundant classes (>1%) in soil samples from different groups

| Class | Groups (Percentage, %) | | |
| --- | --- | --- | --- |
| L | M | H |
| Gammaproteobacteria | 12.61±5.27a | 12.61±3.41a | 25.24±14.05a |
| Alphaproteobacteria | 16.12±2.97a | 12.09±2.66a | 12.93±3.60a |
| Bacteroidia | 6.18±2.23b | 3.84±0.53b | 11.58±5.16a |
| Subgroup_6 | 4.19±1.54b | 12.72±2.47a | 1.97±1.25b |
| Acidobacteriia | 10.52±8.28a | 2.04±0.29b | 5.66±3.01ab |
| Bacilli | 4.15±1.40b | 2.12±0.89b | 8.16±3.05a |
| Blastocatellia_Subgroup_4 | 4.13±3.61b | 9.41±4.23a | 0.72±0.26b |
| Clostridia | 3.67±1.42b | 1.15±0.50b | 9.45±3.35a |
| Actinobacteria | 5.91±2.87a | 1.92±0.73b | 3.35±1.67ab |
| Deltaproteobacteria | 3.16±0.77b | 4.94±1.27a | 1.92±0.59b |
| Gemmatimonadetes | 3.60±1.00b | 5.44±0.52a | 0.87±0.52c |
| Acidimicrobiia | 2.17±0.64a | 2.79±0.95a | 2.67±1.59a |
| Thermoleophilia | 3.57±1.31a | 1.64±0.39b | 0.89±0.76b |
| Verrucomicrobiae | 2.56±0.94a | 1.01±0.31b | 1.48±0.75ab |
| Nitrospira | 1.36±0.64b | 2.52±0.66a | 0.38±0.17c |
| Anaerolineae | 0.97±0.83b | 2.73±1.04a | 0.51±0.30b |
| NC10 | 0.84±0.55b | 2.43±0.67a | 0.36±0.17b |
| KD4-96 | 1.20±0.28a | 1.43±0.81a | 0.73±1.02a |
| Holophagae | 1.08±0.40b | 1.84±0.54a | 0.37±0.29c |

Note: Data are means±standard deviation (n=6). Different letters represent significant differences among three groups at p<0.05.
